# Supplementary material for: Sample preparation protocol for bottom-up proteomic analysis of the secretome of the islets of Langerhans
Source: Royal Society of Chemistry journal article supplement (doi:10.1039/c5an02265g), 2016-01-01
Supplement: c5an02265g2.pdf [file c5an02265g2.pdf]

**Sample preparation protocol for bottom-up proteomic analysis of the secretome  
of islets of Langerhans.**

Andrew Schmudlach,<sup>1</sup> Jeremy Felton,<sup>2</sup> Cynthia Cipolla,<sup>2</sup> Liangliang Sun,<sup>1</sup> Robert T.  
Kennedy,<sup>2</sup> Norman J. Dovichi,<sup>1</sup>

Supporting information – Figure S1 (A-F)

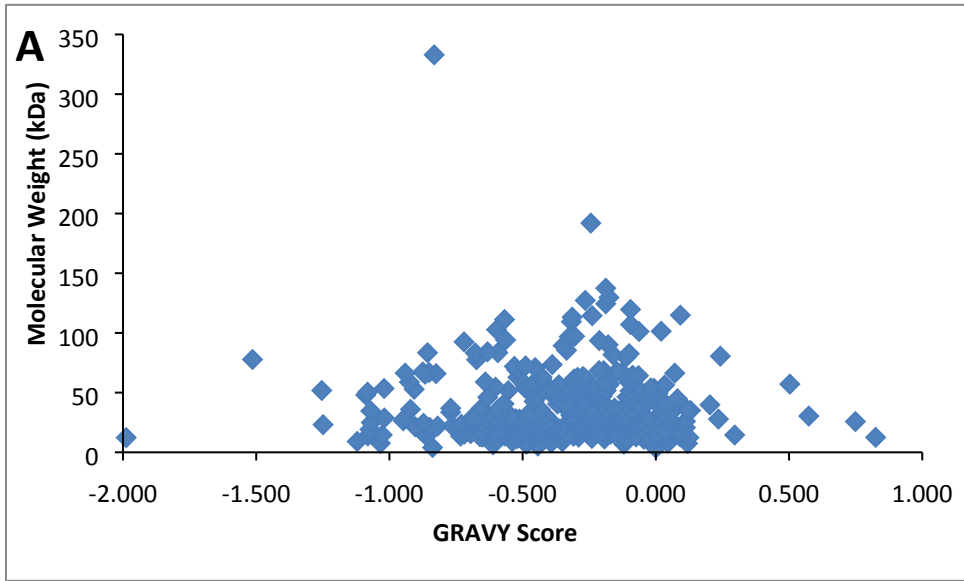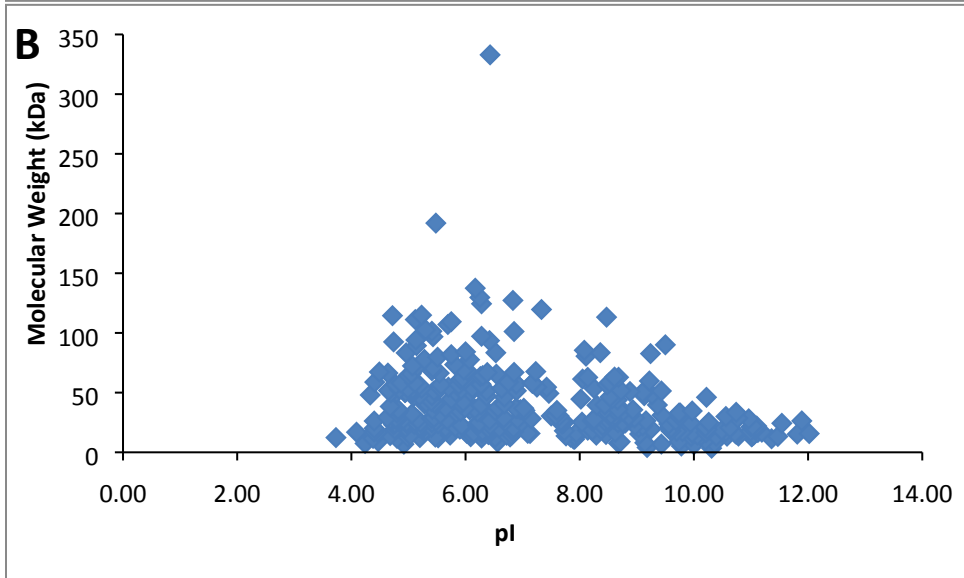

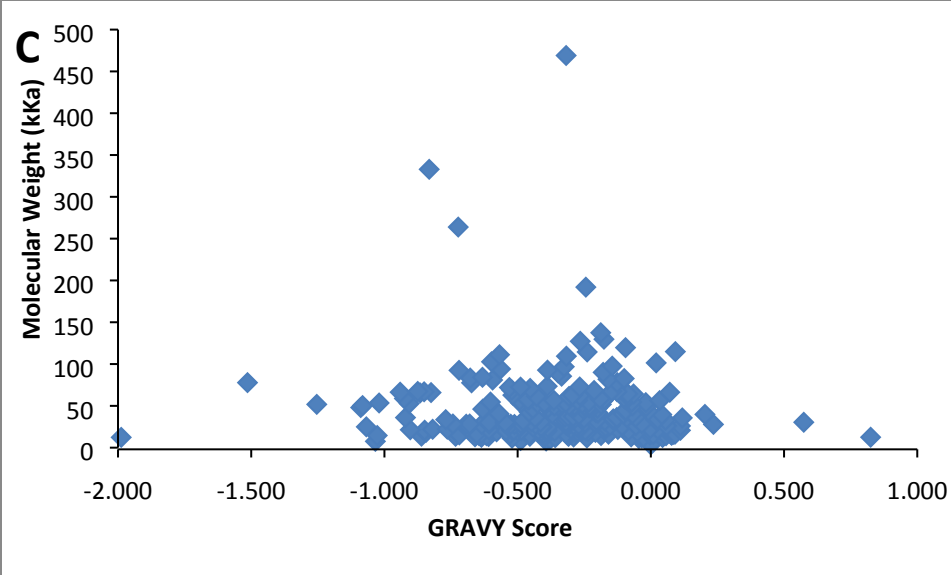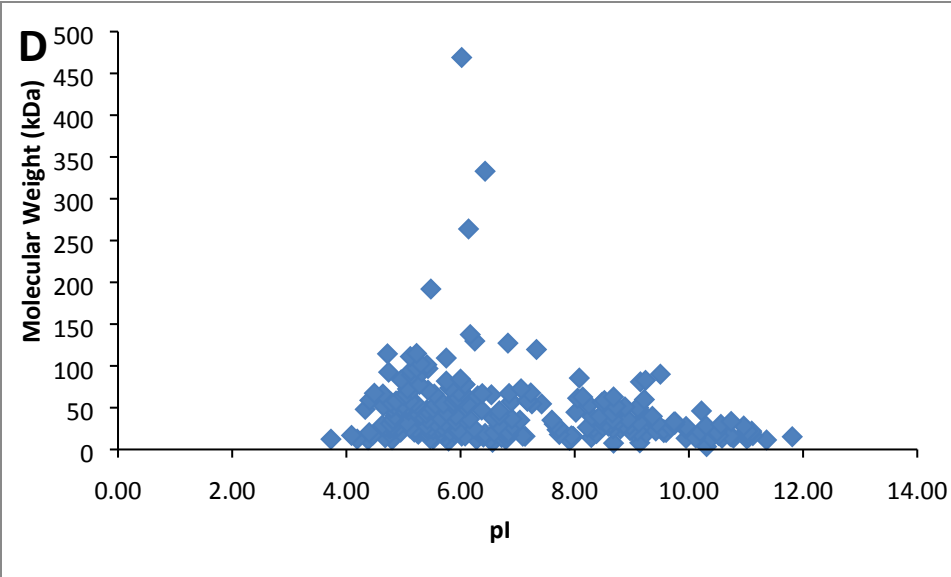

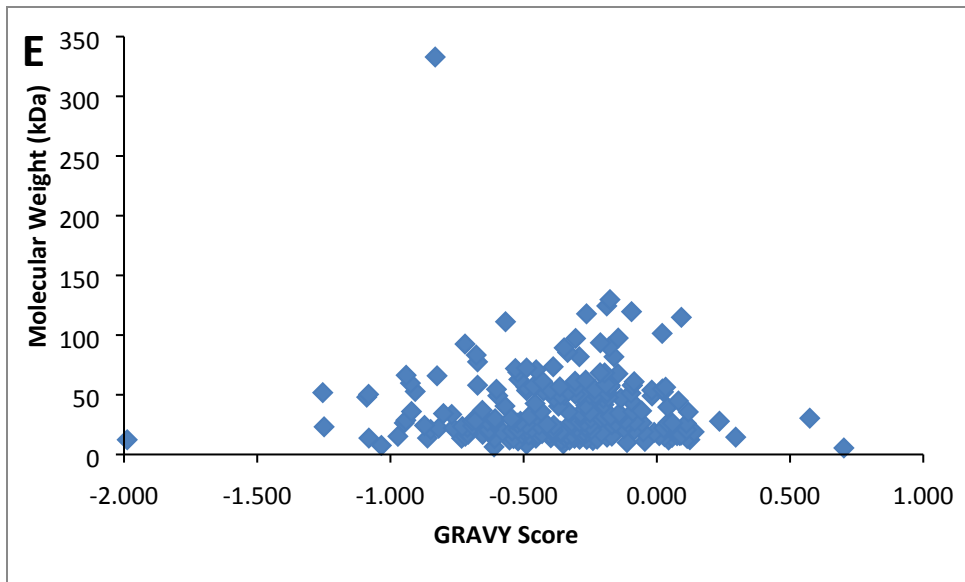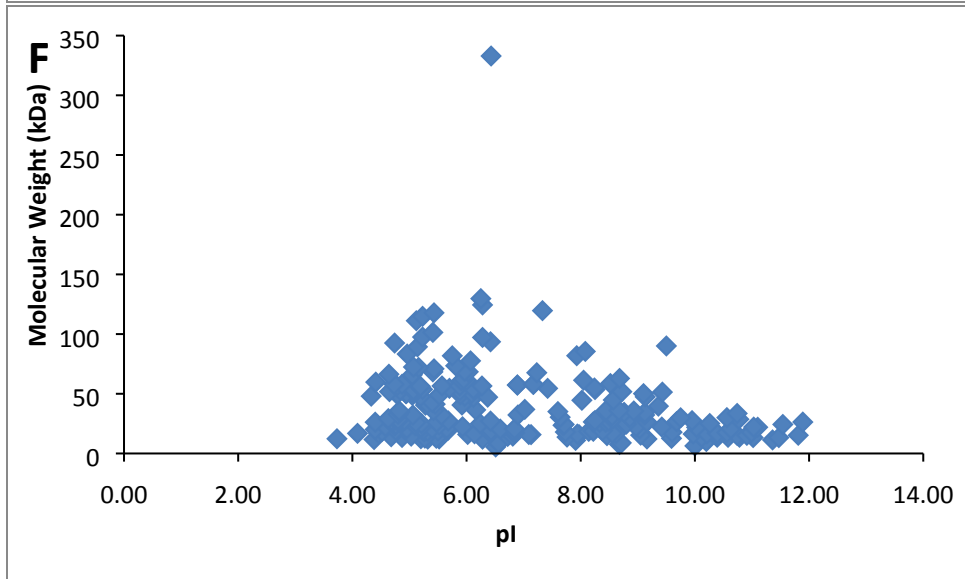

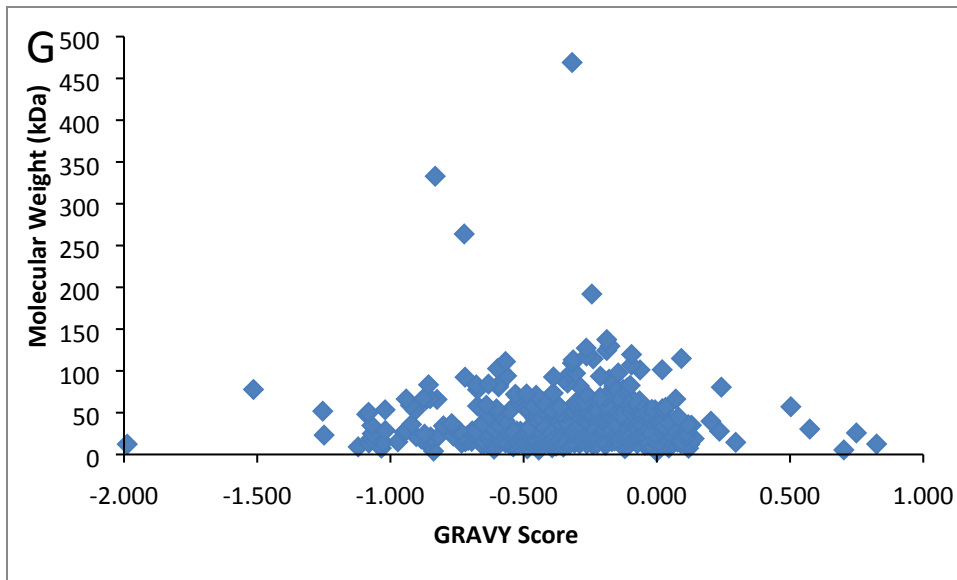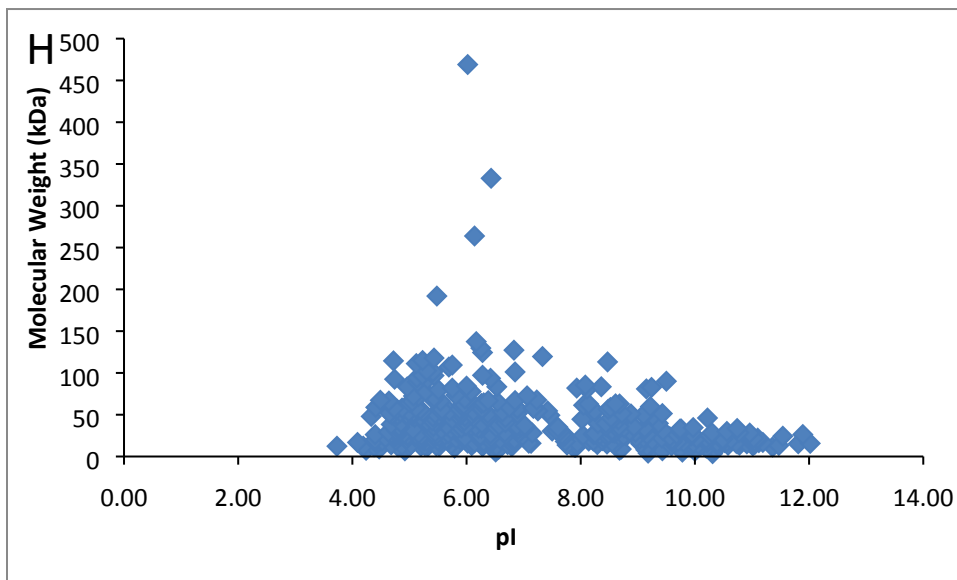

Supplemental Figure 1: Distribution of molecular weight, GRAVY scores, and pI for each protein identified in the SDS (A,B), NP-40 (C,D), RapiGest (E,F), and combined samples (H,G). GRAVY scores are a measure of hydrophobicity with more positive numbers indicating hydrophobicity and negative number indicating hydrophilicity.
